# Supplementary material
Source: PubMed Central journal article supplement (PMC5860354)

Web Table 1. Distributions of Age at First Infertility Episode Based on Different Definitions, Furthering the Understanding of Cancer, Health, and Survivorship in Adult (FUCHSIA) Women's Study, 2012–2015

| Age at infertility (years) <sup>a</sup> | Infertility definition                       |      |                                           |      |                                              |      |                                           |      |                                       |      |
|-----------------------------------------|----------------------------------------------|------|-------------------------------------------|------|----------------------------------------------|------|-------------------------------------------|------|---------------------------------------|------|
|                                         | 12 months of unprotected intercourse (n=358) |      | 12 months of attempting pregnancy (n=200) |      | 24 months of unprotected intercourse (n=238) |      | 24 months of attempting pregnancy (n=114) |      | Visited a doctor (n=168) <sup>b</sup> |      |
|                                         | N                                            | %    | N                                         | %    | N                                            | %    | N                                         | %    | N                                     | %    |
| 18-29                                   | 281                                          | 78.5 | 140                                       | 70.0 | 193                                          | 81.1 | 82                                        | 71.9 | 83                                    | 50.0 |
| 30-45                                   | 77                                           | 21.5 | 60                                        | 30.0 | 45                                           | 18.9 | 32                                        | 28.1 | 83                                    | 50.0 |

<sup>a</sup>Age of female participant at her first infertile episode (for each definition)

<sup>b</sup>N=2 missing age at which they visited a doctor

Web Table 2. Prevalence of Infertility by Age at Infertility Based on Different Definitions, Furthering the Understanding of Cancer, Health, and Survivorship in Adult (FUCHSIA) Women's Study, 2012–2015

| Infertility definition                     | Infertility between 18-29<br>years among those aged ≥30 | Infertility between 30-39<br>years among those aged ≥40 |
|--------------------------------------------|---------------------------------------------------------|---------------------------------------------------------|
|                                            | (n=954)<br>n (%)                                        | (n=408)<br>n (%)                                        |
| Unprotected intercourse for 12 months      | 258 (27.0)                                              | 68 (16.7)                                               |
| Attempting pregnancy for 12 months         | 128 (13.4)                                              | 50 (12.3)                                               |
| Unprotected intercourse for 24 months      | 176 (18.5)                                              | 48 (11.8)                                               |
| Attempting pregnancy for 24 months         | 72 (7.6)                                                | 31 (7.6)                                                |
| Visited a doctor for help getting pregnant | 81 (8.5)                                                | 47 (11.5)                                               |
| Physician diagnosis of infertility         | 48 (5.0)                                                | 26 (6.4)                                                |

Web Figure 1. Kaplan-Meier curves of time to spontaneous pregnancy after periods of unprotected intercourse truncated at 10 years and stratified by primary and secondary infertility among Georgia women aged 22-45 from the Furthering the Understanding of Cancer, Health, and Survivorship in Adult Women's Study, 2012-2015.

A) After 6 months of unprotected intercourse (N=432); B) After 12 months of unprotected intercourse (N=358); C) After 24 months of unprotected intercourse (N=238)

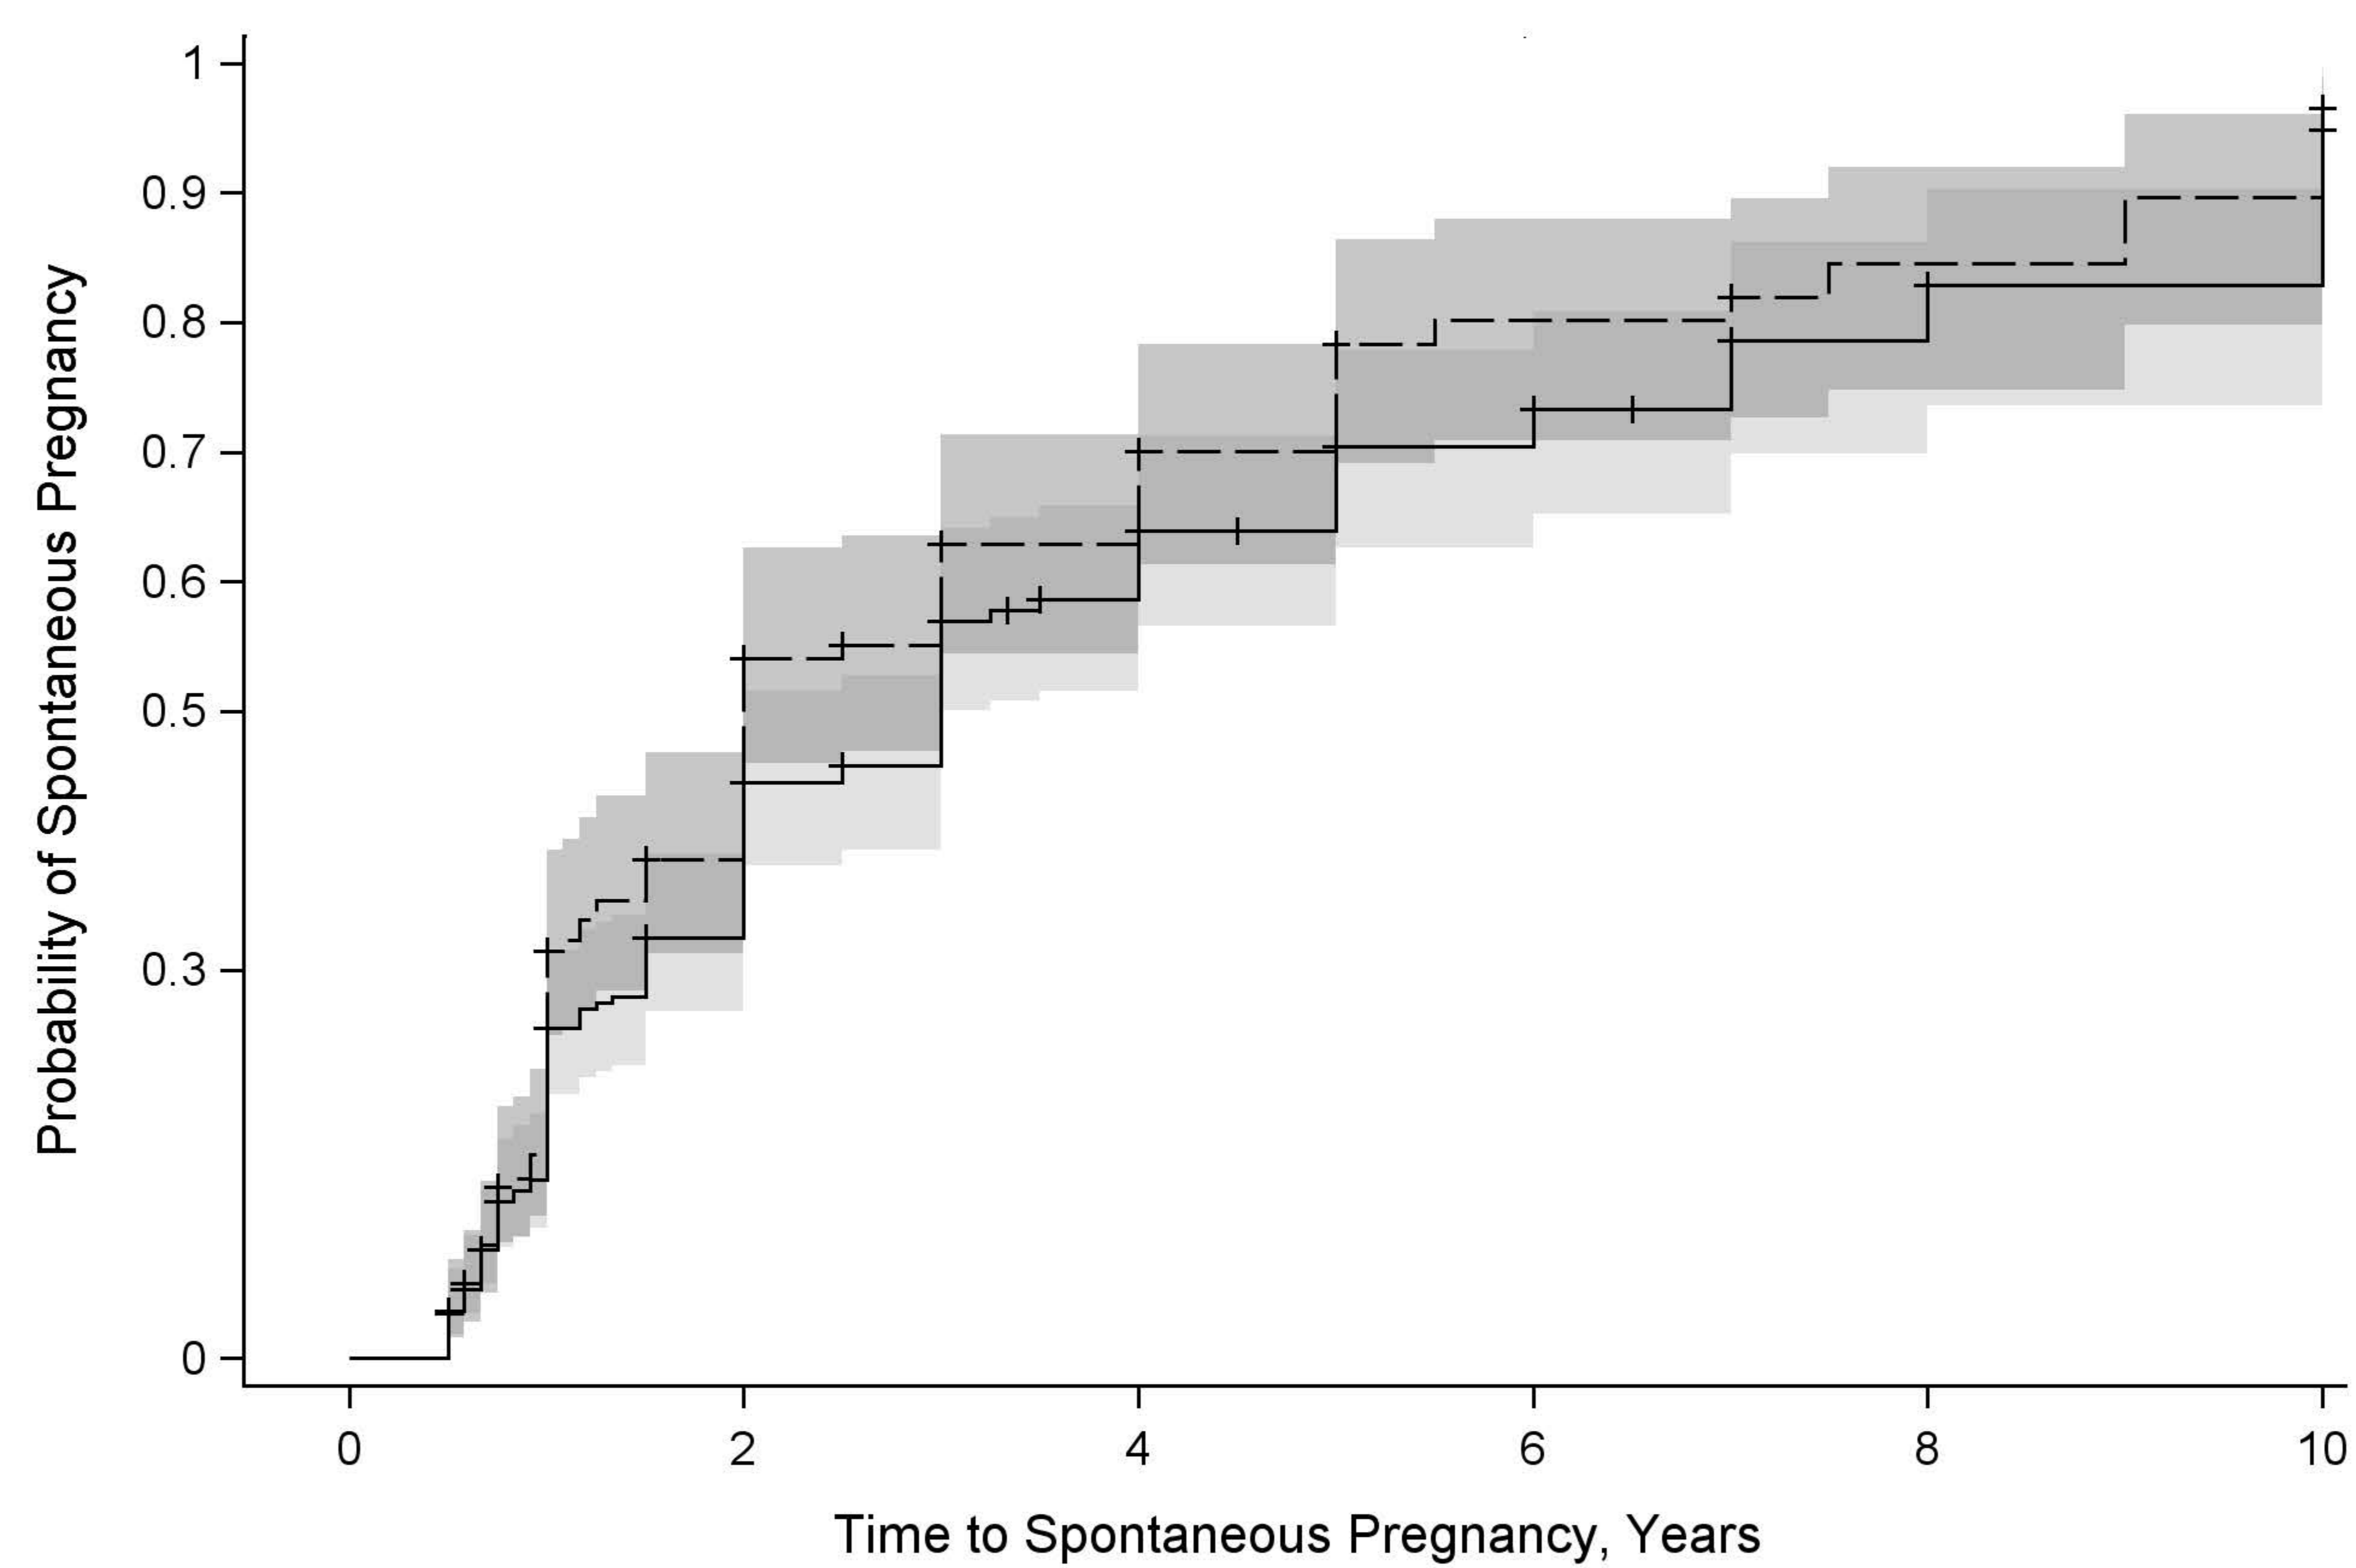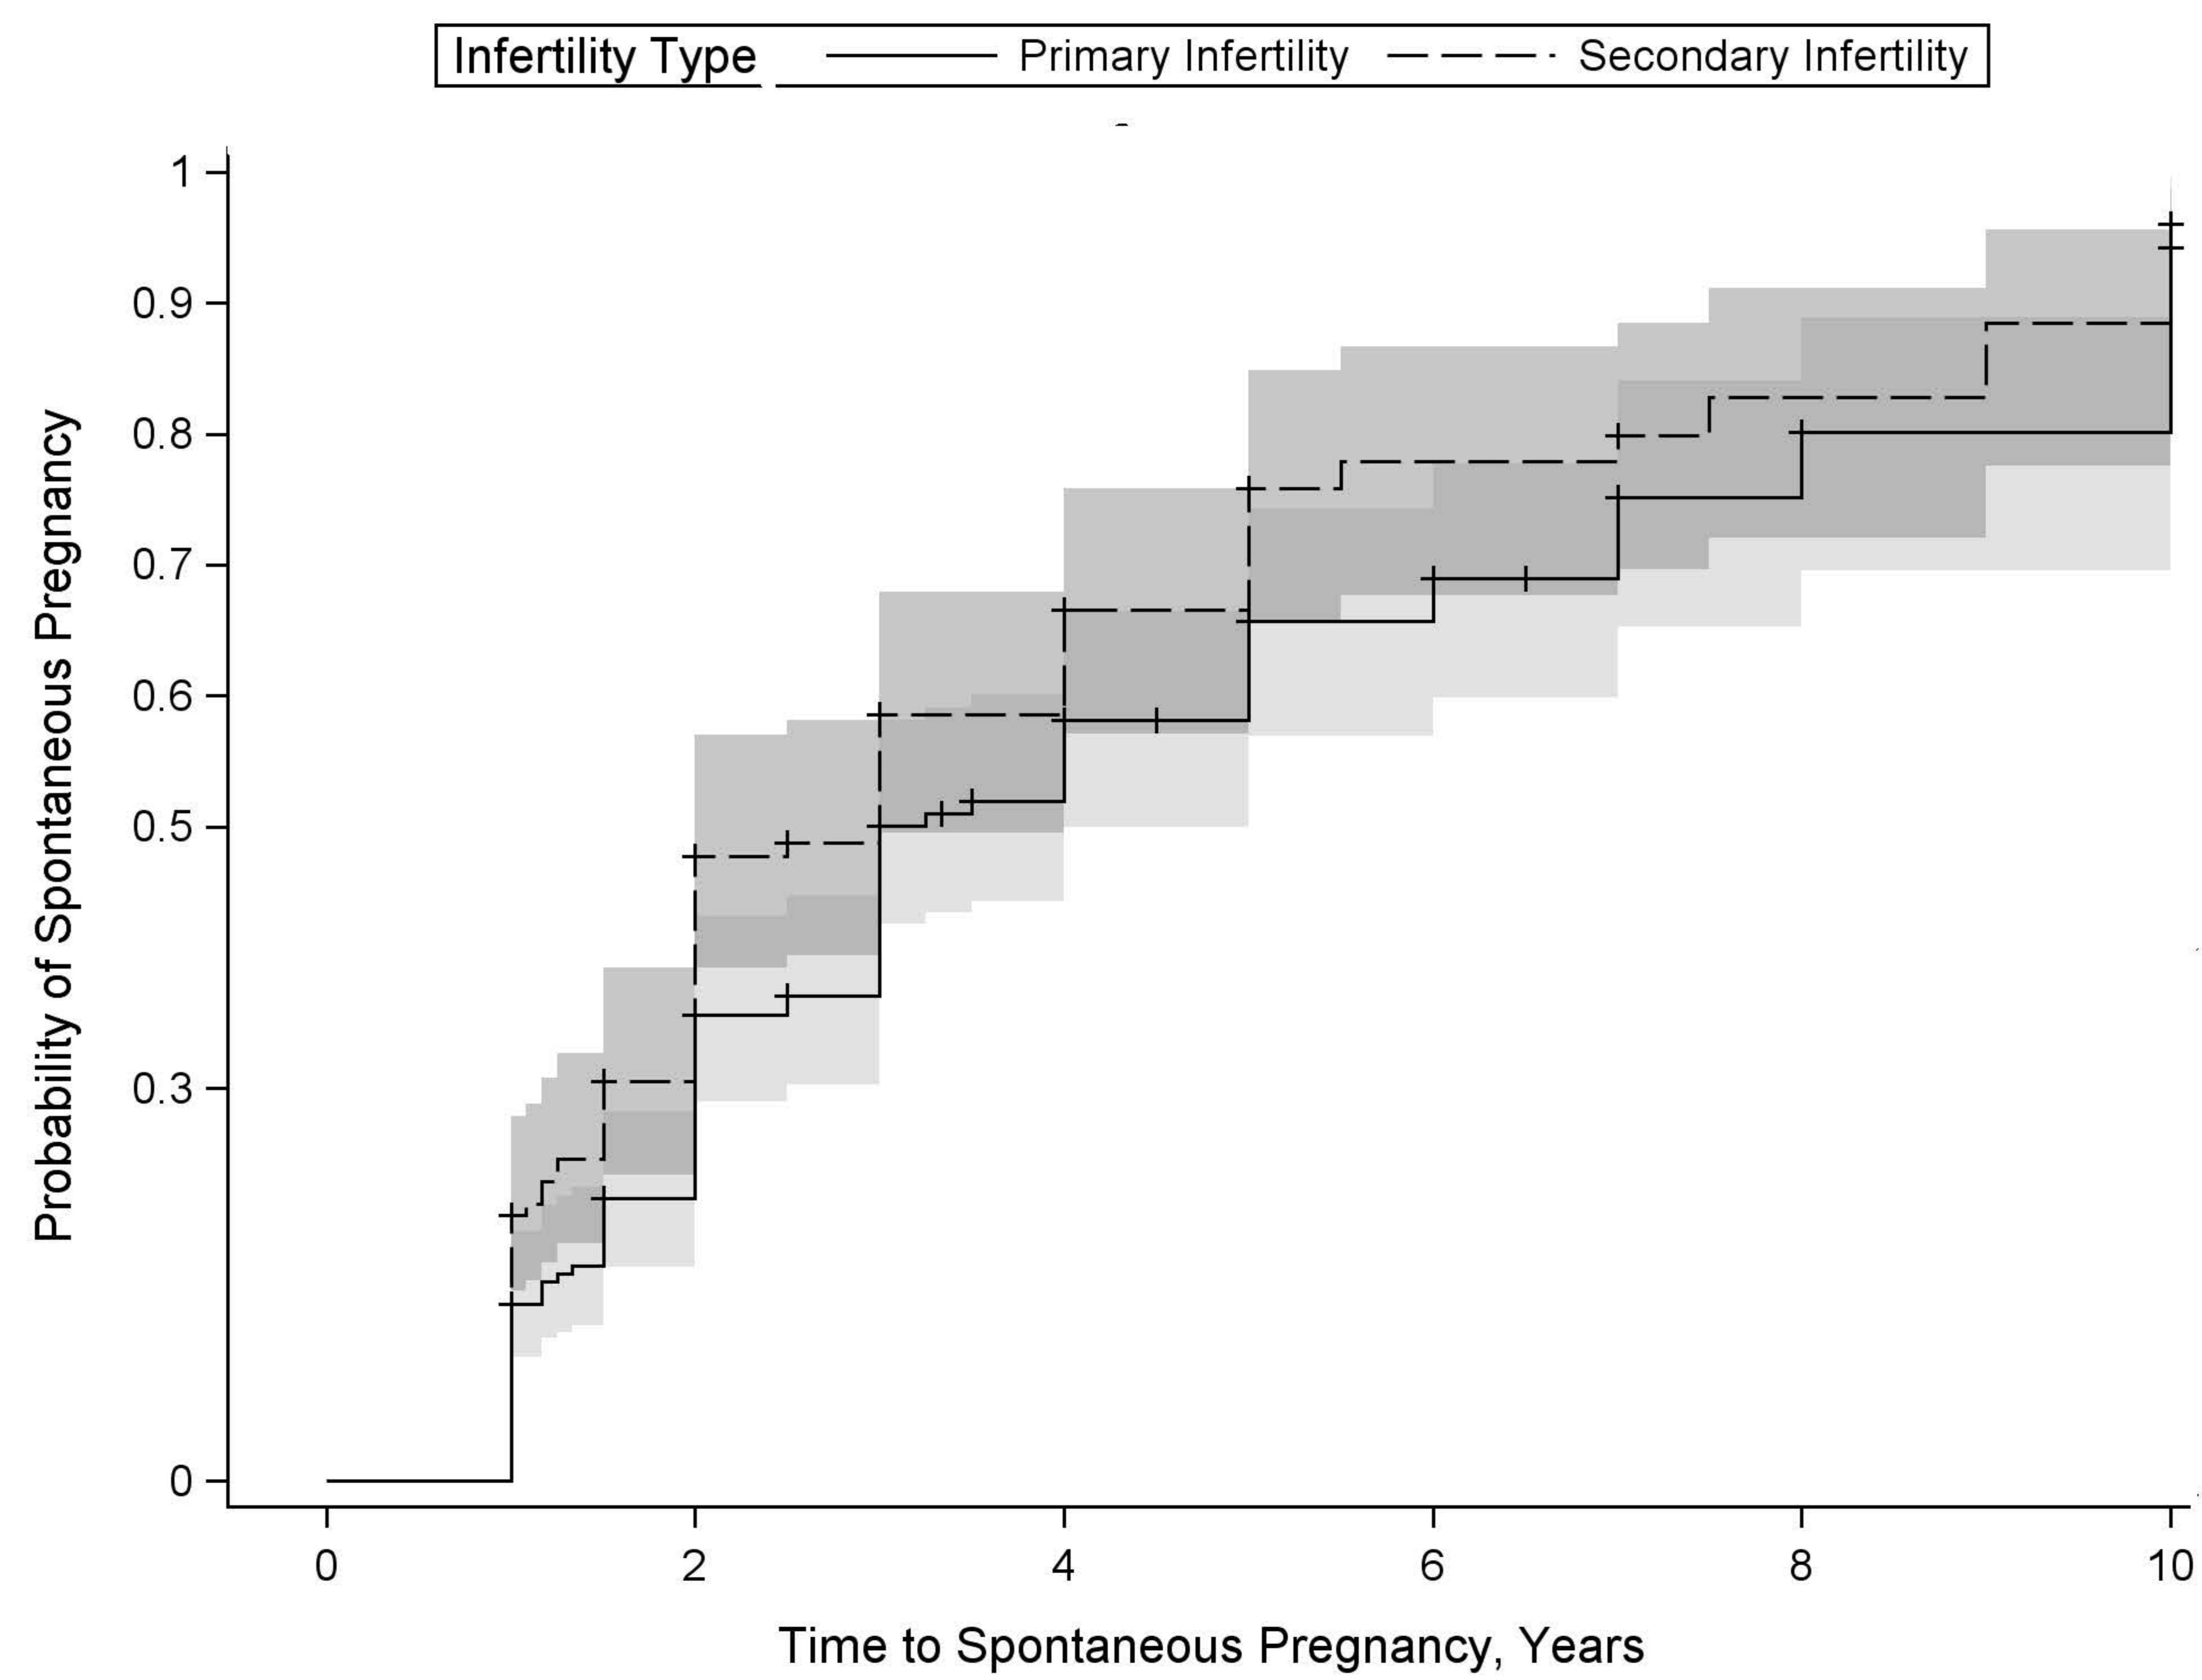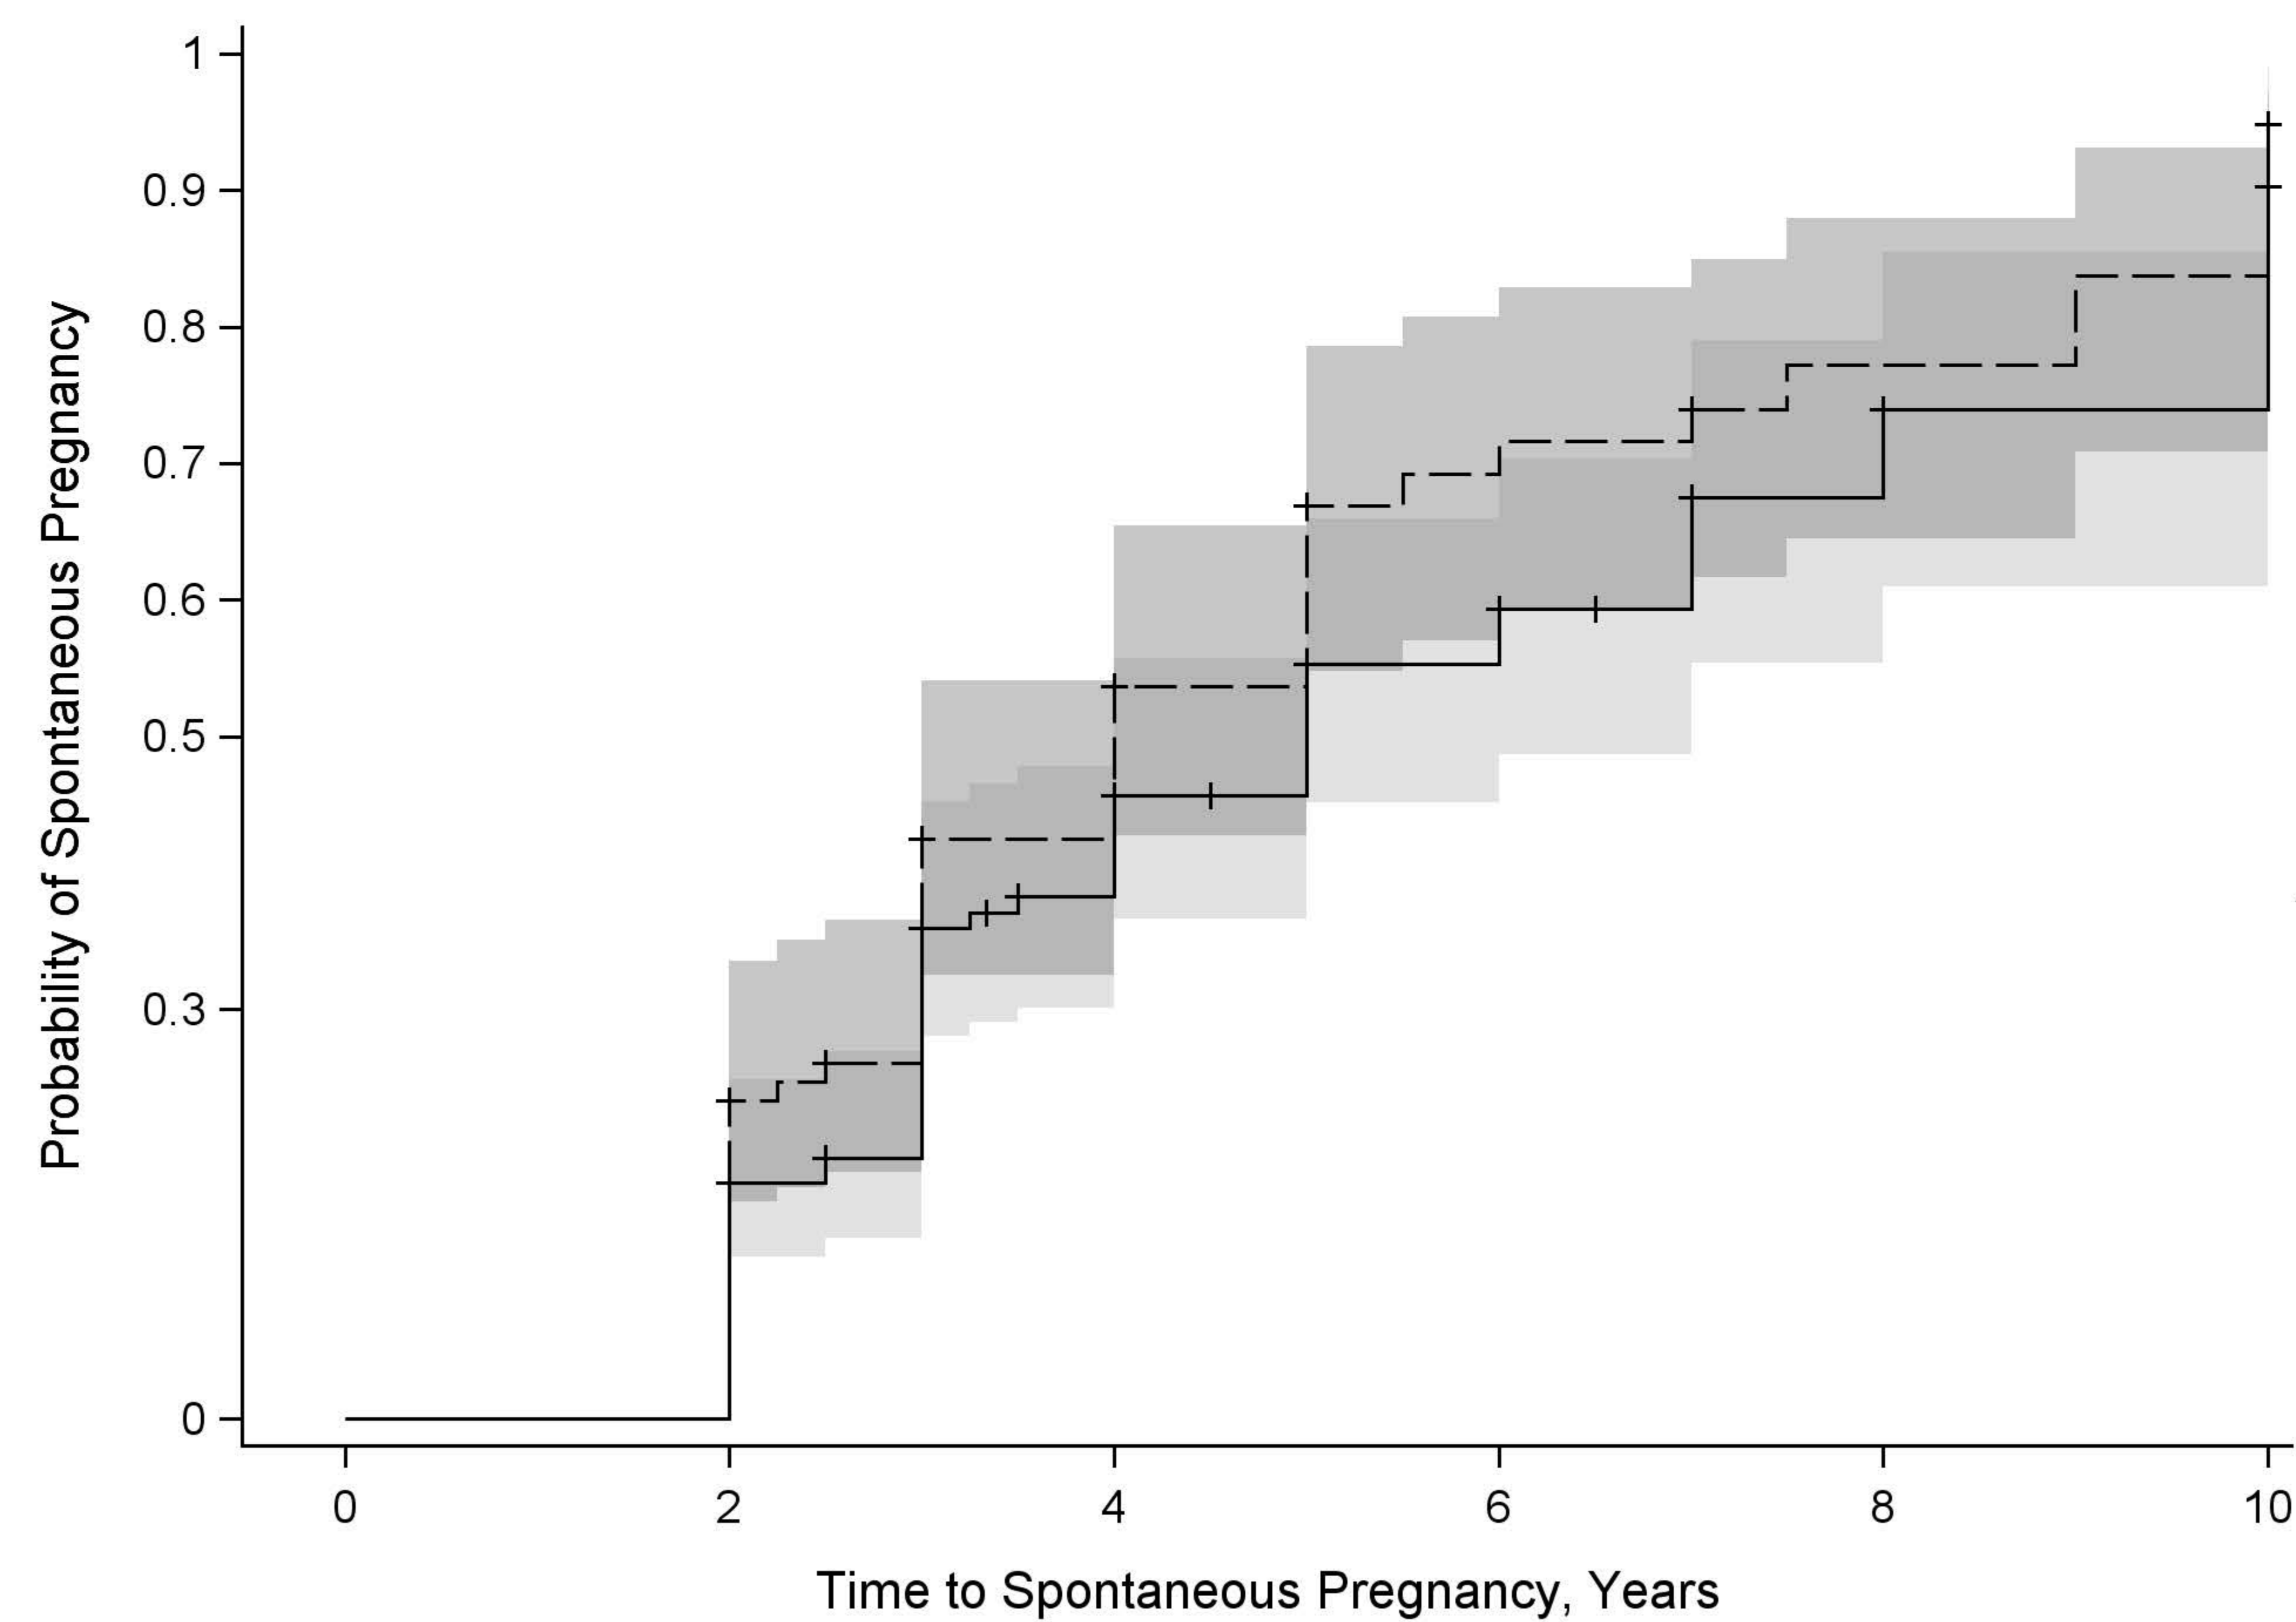

Supplement: kwx240jacobsonwebmaterialfinal.pdf [file kwx240jacobsonwebmaterialfinal.pdf]
